# Supplementary material
Source: PubMed Central journal article supplement (PMC5101164)
Supplement: NIHMS814492-supplement-1.pdf [file NIHMS814492-supplement-1.pdf]

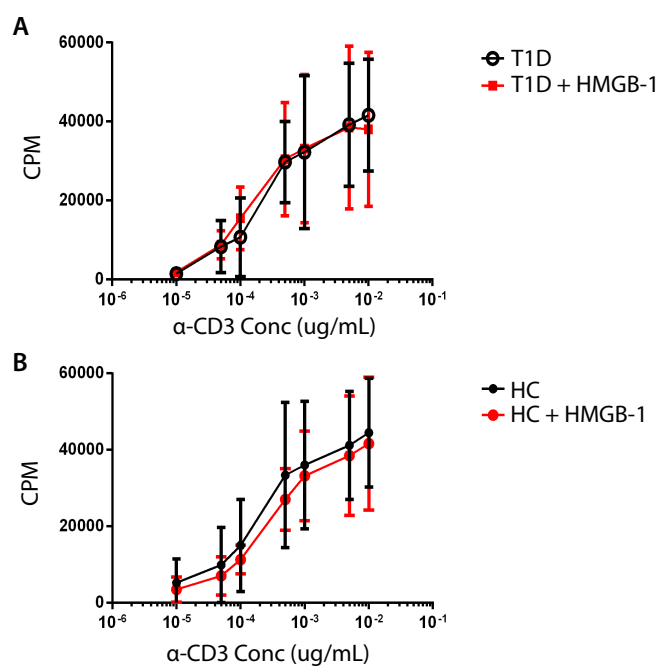

Fig. S1. HMGB-1 stimulation does not affect T cell proliferation in T1D or HC subjects. T cells from T1D (A) or HC (B) subjects were activated under increasing concentrations of  $\alpha$ -CD3 ( $\mu\text{g}/\text{mL}$ ) in the presence (red lines) or absence (black lines) of HMGB-1 (100 ng/mL) for 72h. Cells were labeled with radioactive tritium [ $^3\text{H}$ ] and proliferation was measured by  $^3\text{H}$  quantification and displayed in counts per million (CPM).

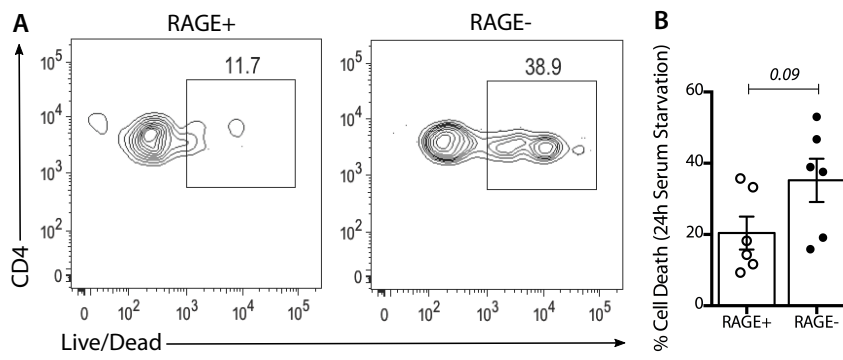

Fig. S2. RAGE increases CD4+ T cell viability in T1D patients.

(A) Representative cell viability staining in T1D CD4+ T cells following 24h serum starvation. RAGE+ cells are displayed on the left and RAGE- cells are on the right. (B) Percent cell death was measured in RAGE+ (open circles) and RAGE- (filled circles) CD4 T cell populations following 24h serum starvation (n = 6). Statistical significance was determined using a Wilcoxon signed-rank test.

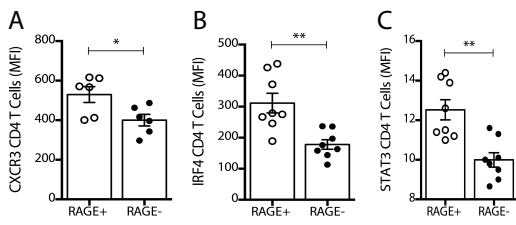

Fig. S3. Inflammatory markers are elevated in RAGE+ CD4+ T1D T cells.

(A-C) CXCR3 (A, n=6), IRF4 (B, n=8), and STAT3 (C, n=8) levels were measured in RAGE+ (left) and RAGE- (right) unstimulated CD4+ T1D patient T cells. Statistical significance was calculated with a Wilcoxon signed-rank test for all experiments (\*\*<math><0.01</math>, \*<math><0.05</math>).

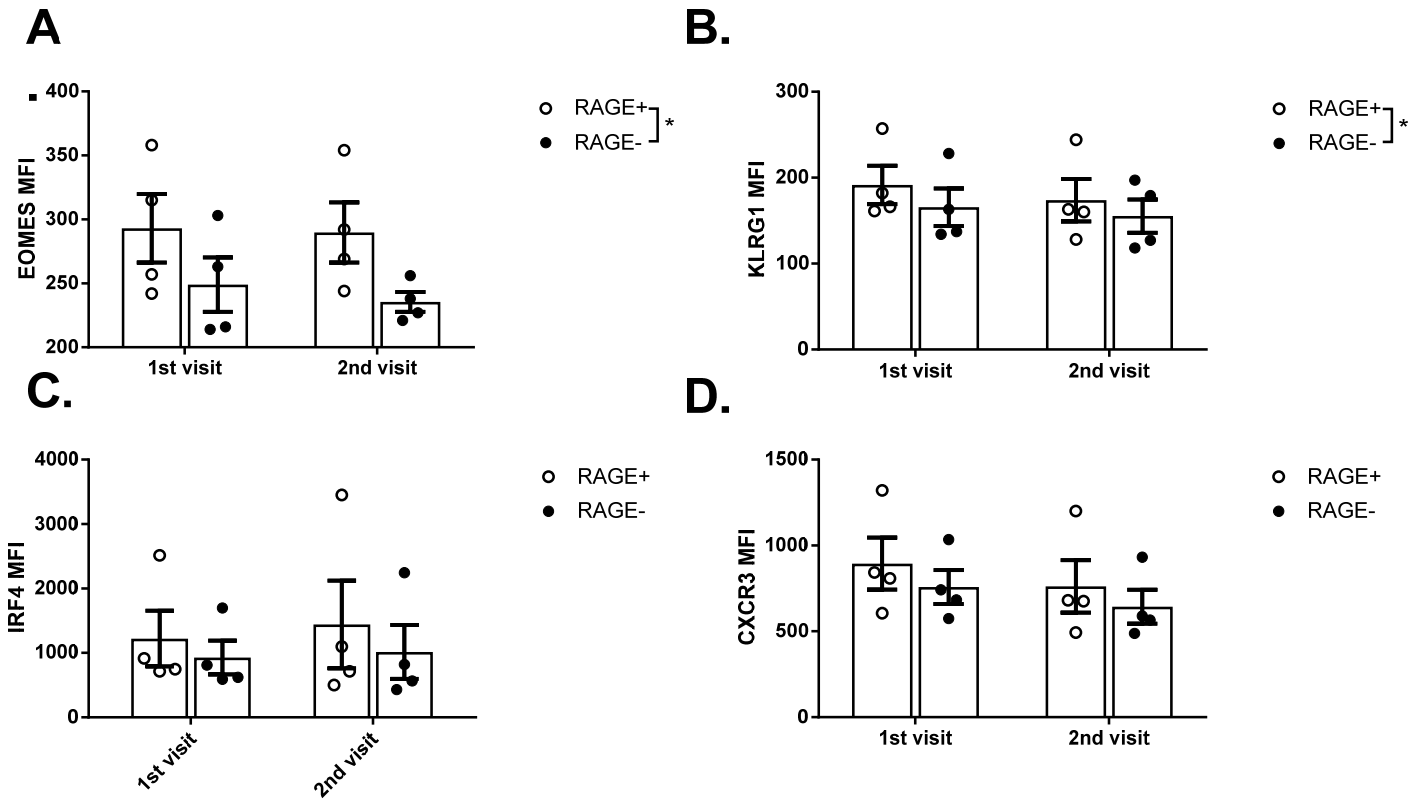

Fig S4: Phenotype of CD4<sup>+</sup> RAGE<sup>+</sup> and RAGE<sup>-</sup> T cells in subjects at-risk for T1D. The phenotype of CD4<sup>+</sup> RAGE<sup>+</sup> (open circles) and RAGE<sup>-</sup> (closed circles) CD4<sup>+</sup> T cells was studied on two study visits prior to onset of T1D in at-risk subjects who progressed to T1D. There is a significant difference in the expression of EOMES (A) and KLRG1 (B) in the RAGE<sup>+</sup> vs RAGE<sup>-</sup> T cells ( $p < 0.05$ )
